# Supplementary material for: Incorporation of volcanic SO 2 emissions in the Hemispheric CMAQ (H-CMAQ) version 5.2 modeling system and assessing their impacts on sulfate aerosol over the Northern Hemisphere
Source: Copernicus journal article supplement (doi:10.5194/gmd-14-5751-2021), 2021-09-16
Supplement: Supplementary file 1 [file gmd-14-5751-2021-supplement.pdf]

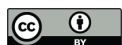

*Supplement of*

**Incorporation of volcanic SO<sub>2</sub> emissions in the Hemispheric CMAQ (H-CMAQ) version 5.2 modeling system and assessing their impacts on sulfate aerosol over the Northern Hemisphere**

**Syuichi Itahashi et al.**

*Correspondence to:* Syuichi Itahashi ([isyuichi@criepi.denken.or.jp](mailto:isyuichi@criepi.denken.or.jp))

The copyright of individual parts of the supplement might differ from the article licence.

(a) OMI satellite observation

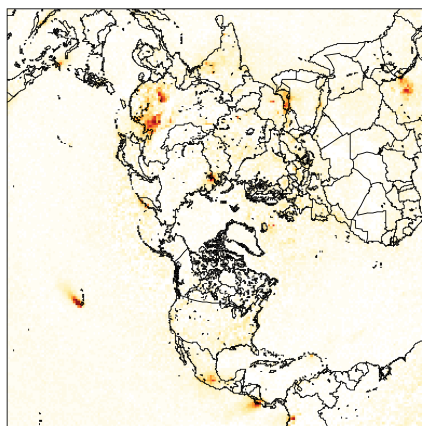

(b) Model (original H-CMAQ)

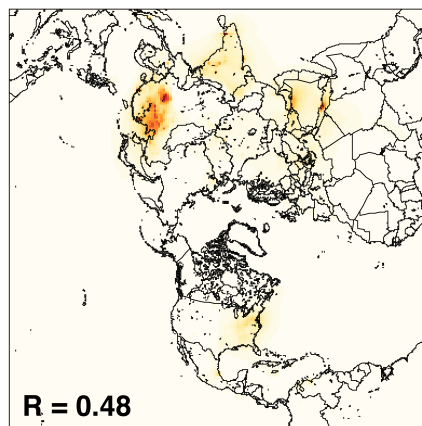

(c) Model (H-CMAQ with volcanic SO2)

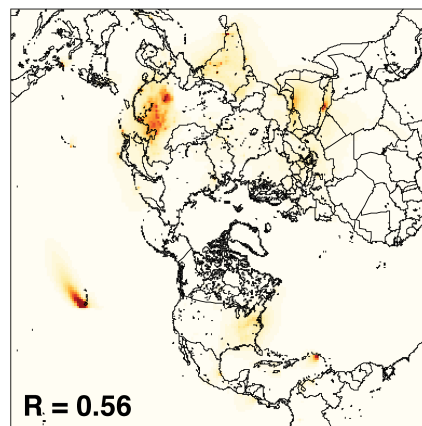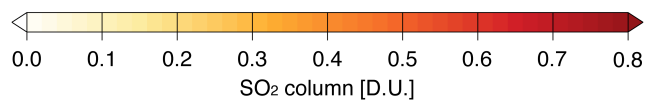

**Figure S1.** Annual averaged SO<sub>2</sub> column in 2010 of (a) observed by OMI satellite and simulated by (b) original H-CMAQ and (c) H-CMAQ with incorporation of volcanic SO<sub>2</sub> emissions. The spatial correlation coefficient with satellite observation are noted at left-bottom corner of (b) and (c).

**Table S1. Statistical analysis of modeled SO<sub>2</sub> concentration with observations.**

|                                      | N    | Mean        |       | R       | NMB    | NME   |
|--------------------------------------|------|-------------|-------|---------|--------|-------|
|                                      |      | Observation | Model |         |        |       |
| CASTNET                              |      |             |       |         |        |       |
| –original H-CMAQ                     | 4216 | 1.69        | 2.81  | 0.57*** | +66.1% | 94.7% |
| –incorporation of volcanic emissions |      |             | 2.83  | 0.58*** | +67.4% | 94.9% |

Note: The unit of mean for observations and simulations is ppbv. Significance levels by Students’ t-test for correlation coefficients between observations and simulations are remarked as \*p < 0.05, \*\*p < 0.01, and \*\*\*p < 0.001, and lack of a mark indicates no significance.

**Table S2. Statistical analysis of modeled SO<sub>4</sub><sup>2-</sup> concentration in precipitation and wet deposition with observations.**

|                                                              | N     | Mean        |        | R       | NMB    | NME   |
|--------------------------------------------------------------|-------|-------------|--------|---------|--------|-------|
|                                                              |       | Observation | Model  |         |        |       |
| SO <sub>4</sub> <sup>2-</sup> concentration in precipitation |       |             |        |         |        |       |
| EANET                                                        |       |             |        |         |        |       |
| –original H-CMAQ                                             | 2657  | 4743.7      | 1152.5 | 0.35*** | −75.7% | 81.9% |
| –incorporation of volcanic emissions                         |       |             | 1236.0 | 0.35*** | −73.9% | 81.6% |
| NADP                                                         |       |             |        |         |        |       |
| –original H-CMAQ                                             | 7377  | 842.7       | 631.5  | 0.33*** | −25.1% | 61.9% |
| –incorporation of volcanic emissions                         |       |             | 653.1  | 0.32*** | −22.5% | 61.6% |
| Precipitation                                                |       |             |        |         |        |       |
| EANET                                                        | 4497  | 16.6        | 13.7   | 0.37*** | −17.4% | 56.3% |
| NADP                                                         | 10670 | 21.4        | 16.5   | 0.55*** | −23.1% | 66.9% |
| SO <sub>4</sub> <sup>2-</sup> wet deposition                 |       |             |        |         |        |       |
| EANET                                                        |       |             |        |         |        |       |
| –original H-CMAQ                                             | 2676  | 406.7       | 122.0  | 0.45*** | −70.0% | 78.7% |
| –incorporation of volcanic emissions                         |       |             | 131.5  | 0.44*** | −67.6% | 77.9% |
| NADP                                                         |       |             |        |         |        |       |
| –original H-CMAQ                                             | 8154  | 160.4       | 99.3   | 0.46*** | −38.1% | 68.5% |
| –incorporation of volcanic emissions                         |       |             | 103.6  | 0.47*** | −35.4% | 68.4% |

Note: The unit of mean for observations and simulations is g/L for concentration in precipitation and g/ha for wet deposition. Significance levels by Students’ t-test for correlation coefficients between observations and simulations are remarked as \*p < 0.05, \*\*p < 0.01, and \*\*\*p < 0.001, and lack of a mark indicates no significance.
